# Supplementary material for: Preparation of a single and reusable biopolymer-based film for the extraction and preconcentration of anti-inflammatory drugs from environmental water samples
Source: Royal Society of Chemistry journal article supplement (doi:10.1039/d3ra00166k), 2023-01-01
Supplement: d3ra00166k1.pdf [file d3ra00166k1.pdf]

## SUPPLEMENTARY INFORMATION

### Preparation of a single and reusable biopolymer-based film for the extraction and preconcentration of non-steroidal anti-inflammatory drugs from natural water samples

Maite V. Aguinaga Martínez, Claudia E. Domini\*, Carolina C. Acebal\*

INQUISUR, Departamento de Química, Universidad Nacional del Sur (UNS)-CONICET, Av. Alem 1253, 8000 Bahía Blanca, Argentina

Corresponding authors: cdomini@criba.edu.ar; cacebal@uns.edu.ar

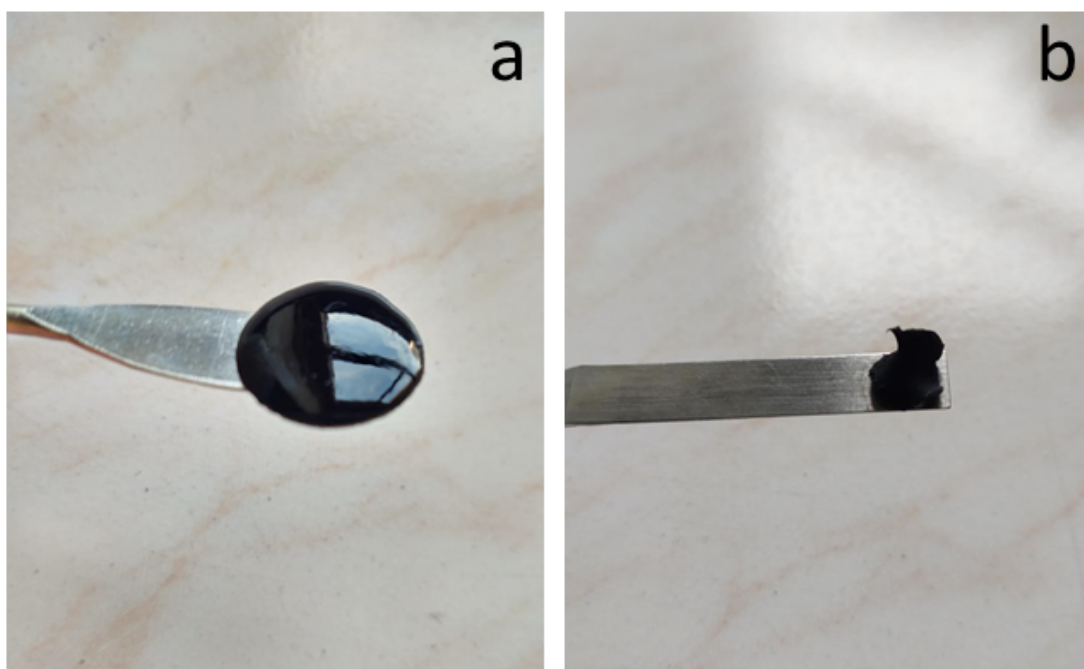

**Figure S1.** Images of the MWCNTs-agarose film before (a) and after its drying (b).

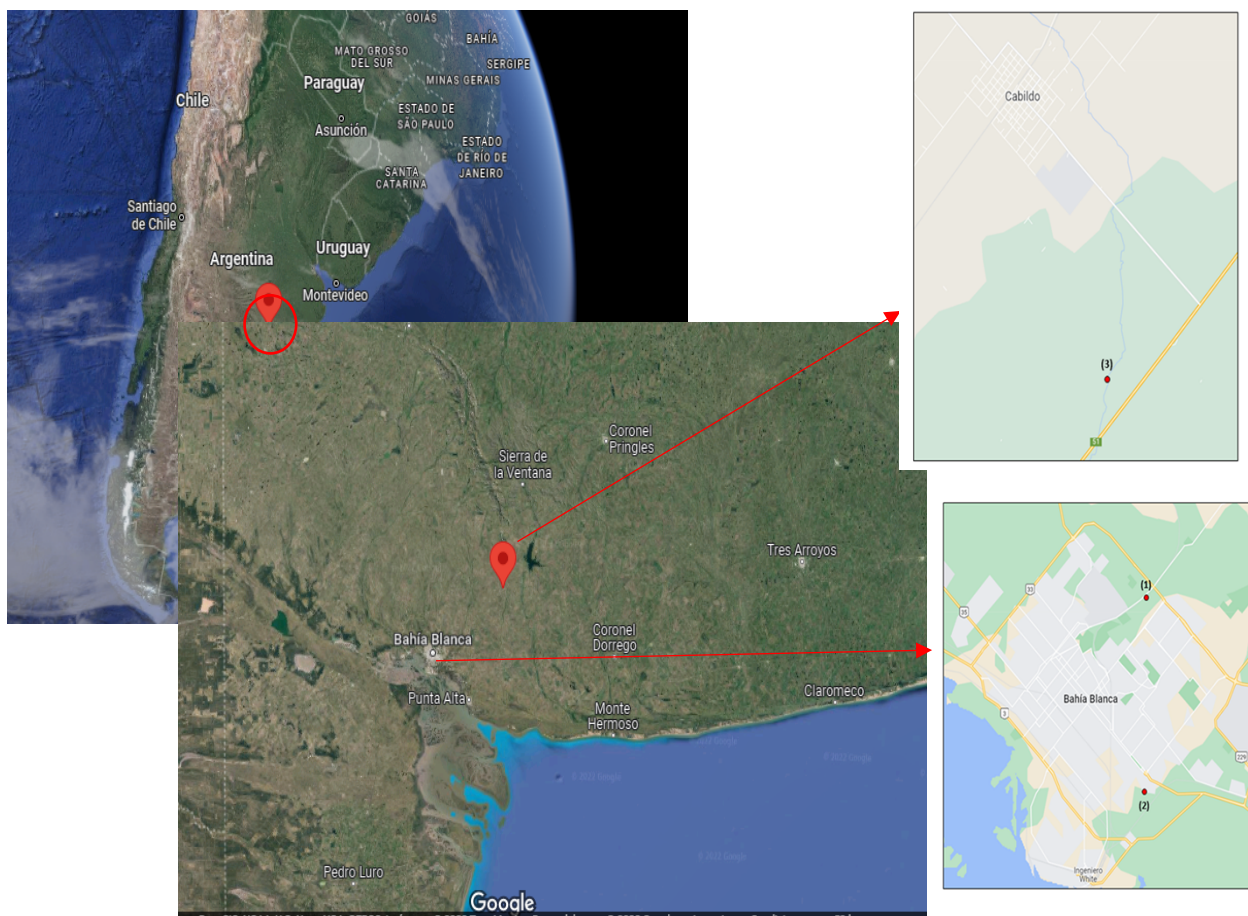

**Figure S2.** Sampling points: (1) Napostá stream, (2) Napostá Stream, (3) Napostá Chico stream

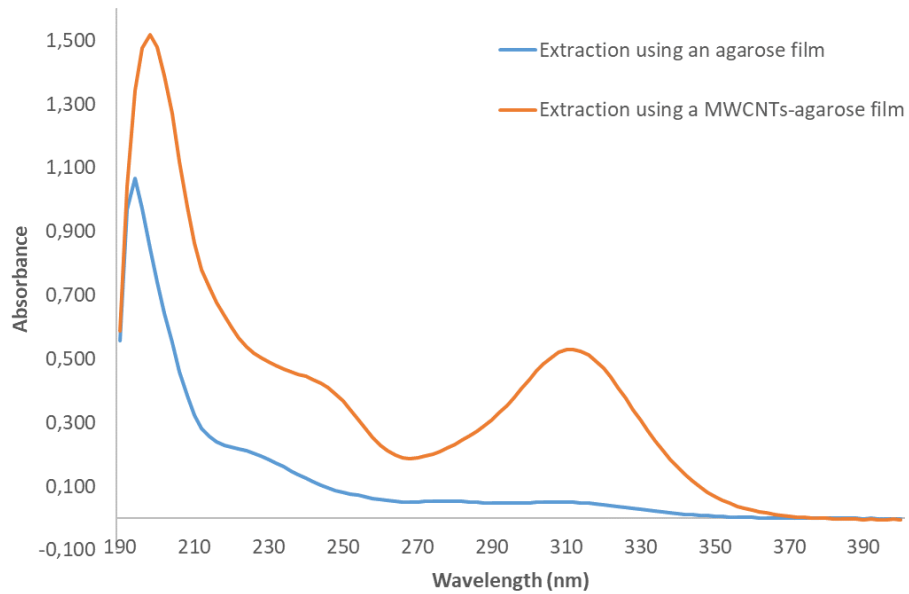

**Figure S3.** Comparison between the spectra of the extraction of KET using a film composed only with agarose and a film of MWCNTs-agarose

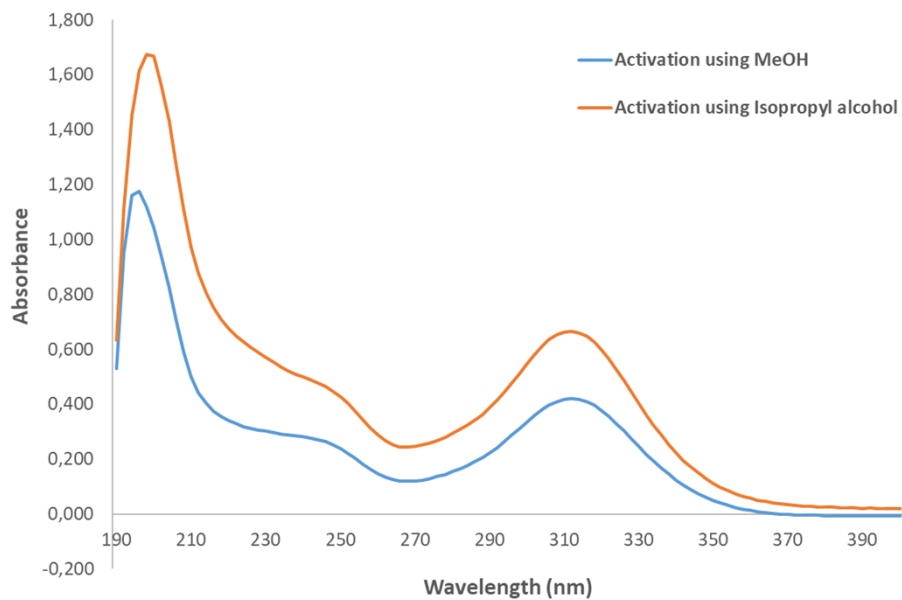

**Figure S4.** Comparison between the spectra of the extraction of KET using a MWCNTs-agarose film conditioned with MeOH and a film conditioned with isopropyl alcohol.

**Table S1.** Comparison of different procedures and formats for agarose-based sorbents found in the literature.

| Agarose solution (g L <sup>-1</sup> ) <sup>1</sup> | Sorbent | Concentration of sorbent (% w/v) <sup>2</sup> | Temperature (°C) | Drying step           | Film format                                         | Sorbent reused | REF      |
|----------------------------------------------------|---------|-----------------------------------------------|------------------|-----------------------|-----------------------------------------------------|----------------|----------|
| 10                                                 | MWCNTs  | 0.30                                          | 100              | 40°C, 24 h            | Circular pieces with certain size (5 mm diameter)   | No             | [9]      |
| 10                                                 | C18     | 0.40                                          | 100              | Room temperature, 48h | Small piece of square sheet (1.5 cm x 1.5 cm)       | n.i.           | [10]     |
| 8                                                  | MWCNTs  | 0.14                                          | n.i              | Without drying        | Small pieces of cube (3x3x3 mm in length)           | No             | [11]     |
| 10                                                 | C18     | 0.50                                          | 90               | 60 °C, 48 h           | Circular discs of 5 mm diameter                     | n.i.           | [12]     |
| 10                                                 | MWCNTs  | 0.40                                          | 90               | 60°C, 48 h            | Circular pieces 5 mm diameter (0.15 mg MWCNTs each) | No             | [31]     |
| 10                                                 | MWCNTs  | 1.60                                          | 80               | 40°C, 24 h            | Unique piece                                        | Yes (50 times) | Our work |

<sup>1</sup> Initial concentration; <sup>2</sup> Calculated in the final solution used for the film
